# Supplementary material
Source: Springer Nature journal article supplement (https://www.springermedizin.de/resource/supplementary/12958_2011_932_MOESM2_ESM.pdf/9568844)

R  
e  
s  
u  
l  
t

pos

neg

132  
26.0%

55  
10.8%

130  
25.6%

191  
37.6%

7

12

QDR

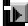

Supplement: MOESM2 [file 9568844]
